# Supplementary material for: Experimental and Modeling Study on the Removal of Mn, Fe, and Zn from Fiberboard Industrial Wastewater Using Modified Activated Carbon
Source: MDPI journal article supplement (doi:10.3390/su15086734), 2023-04-17
Supplement: s1 [file s1]

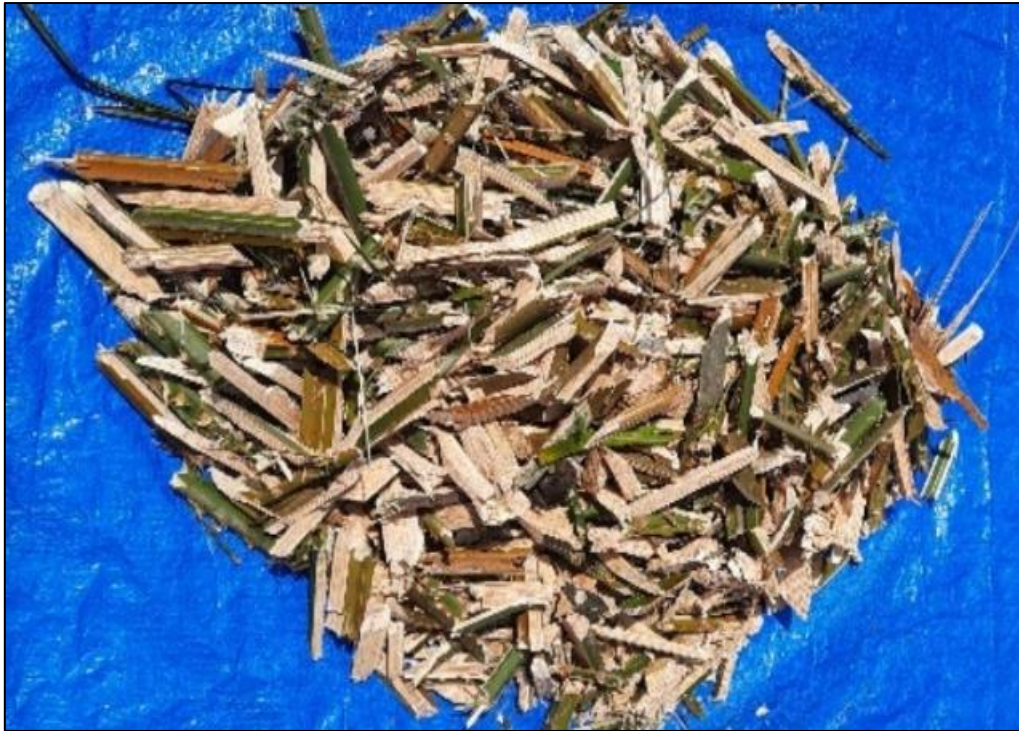

**Figure S1.** The Picture of oil palm petiole (OPP) that has been extracted from oil palm fronds. The leaf was exiled from the oil palm fronds and only the petiole of the oil palm was employed in our study.
