# Supplementary material for: Experimental and Modeling Study on the Removal of Mn, Fe, and Zn from Fiberboard Industrial Wastewater Using Modified Activated Carbon
Source: MDPI journal article supplement (doi:10.3390/su15086734), 2023-04-17
Supplement: s1 [file s1]

Archive with 1 entries (1 files):
- sustainability-2110158-supplementary.pdf
